# Supplementary material for: Squaraines as unique reporters for SERRS multiplexing
Source: Royal Society of Chemistry journal article supplement (doi:10.1039/b715388k), 2007-11-20
Supplement: b715388k.pdf [file b715388k.pdf]

## Squaraines as unique materials for SERRS multiplexing

Robert J. Stokes, Andrew Ingram, Jane Gallagher, David R. Armstrong, W. Ewen Smith,  
Duncan Graham\*

### Supplementary Material

#### i) Materials

Squaraine dyes for SERRS were synthesised according to the methods reported previously.<sup>[8-11]</sup> **SQ2** was prepared from the aniline derivative according to the following: *N*-Methyl aniline (2.000 g, 18.7 mmol) was dissolved in *n*-butan-1-ol (100 ml), then 1-chlorohexan-6-ol (2.796 g, 22.44 mmol), potassium carbonate (7.741 g, 56.1 mmol) and potassium iodide (cat.) were added and the mixture was left to stir at reflux for 48 hrs. Upon cooling, the solvent was removed at reduced pressure, and then the residue was partitioned between diethyl ether (100 ml) and water (100 ml). The organic phase was separated and dried over sodium sulphate before filtration and removal of the solvent by evaporation. The residue was columned in 10% ethyl acetate in hexane, to afford the title compound as a colourless oil (3.01 g, 80 %).  $\delta_{\text{H}}$ (400 MHz; CDCl<sub>3</sub>) 1.3-1.5 (4H, m, 2 x CH<sub>2</sub>), 1.5-1.7 (4H, m, 2 x CH<sub>2</sub>), 2.94 (3H, s, CH<sub>3</sub>), 3.33 (2H, t, *J* 7.5, CH<sub>2</sub>), 3.64 (2H, t, *J* 6.8, CH<sub>2</sub>), 6.70 (3H, m, 3 x ArH), 7.25 (2H, dd, *J* 8.7, 7.2, 2 x ArH).

3,4-Dihydroxy-3-cyclobutene-1,2 dione **SQ2** (0.500g, 6 mmol) and 6-(Methyl-phenyl-amino)hexan-1-ol (1.863 g, 9 mmol) were dissolved in a mixture of toluene (100 ml) and butanol (30 ml) and left to reflux overnight, with the azeotropic removal of water using Dean-Stark apparatus. The now black solution was concentrated *in vacuo*, then precipitated using a mixture of methanol and diethyl ether to afford the title compound as a blue solid (1.7 g, 58 %).  $\delta_{\text{H}}$ (400 MHz; DMSO) 1.2-1.6 (16H, m, 8 x CH<sub>2</sub>), 3.16 (6H, s, 2 x CH<sub>3</sub>), 3.50 (4H, t, *J* 7.0, 2 x CH<sub>2</sub>), 3.67 (4H, t, *J* 6.2, 2 x CH<sub>2</sub>), 6.95 (4H, d, *J* 9.1, 4 x ArH), 7.25 (4H, d, *J* 9.1, 4 x ArH).

#### ii) Sample preparation

The spectra were recorded from within standard microtitre plate wells. The samples were diluted to various concentrations using sterile water (18.2 M $\Omega$ .cm). Some Squaraine samples were dissolved in methanol prior to further dilution with water. Samples were then prepared for SERRS analysis by adding 7 $\mu$ L of dye or dye-labelled oligonucleotide and 10 $\mu$ L of 0.1 mol dm<sup>-3</sup> of the aggregating agent, followed by 350  $\mu$ L of silver nanoparticles. The samples were analysed within 45-60 s of the addition of the nanoparticles. Typically, single acquisitions were integrated for 1-10 s.

#### iii) Raman spectra acquisition

Spectra were recorded at 632.8 nm  $\lambda_{\text{ex}}$  (HeNe) and 785 nm (diode) using a Renishaw (Gloucestershire, UK) System 1000 and a Leica DM/LM microscope. Backscattered light was collected at 180° to the microtitre plate well using a 20x/0.4 long working distance objective and a 50x/0.75 Leica objective. Dielectric edge filters were used to reject Rayleigh scattering and a 1200 lines/mm grating was used to resolve the spectra onto a red-enhanced RenCam deep-depletion charge-coupled device. The beam was attenuated to provide ~2.5 mW at the sample. The spot size could be varied by the use of a beam expander assembly to avoid localised heating at the water surface. Other laser lines used to examine the spectra 'off-resonance' were 532 nm (frequency doubled diode), 514.5 nm (Ar<sup>+</sup>) and 406 nm (Kr<sup>+</sup>). In the case recording spectra from the monolayers on Klarite™ (D3 Technologies, UK) it was necessary to reduce the incident power significantly (to ~20  $\mu$ W) to avoid localised sample burning. This is true for all dye reporters examined (not just squaraines) and is not a symptom of photo-bleaching. SAMs for direct SERRS intensity comparison were deposited from 1 x 10<sup>-5</sup> M solutions (1% poly-L-lysine). The exact conditions for the application of these materials into SERRS systems will vary from case to case. For example **SQ2** requires the use of poly-L-lysine or a linker material to

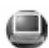

Supplementary Material (ESI) for Chemical Communications  
 This journal is (c) The Royal Society of Chemistry 2007

generate strong SERRS on the Klarite™ surface, whereas **SQ6** does not. Spectra were baseline corrected using an established procedure found in commercial available Klarite™ protocols (D3 Technologies, UK).

iv) *Calculated Raman and IR intensities(I)*

Below is listed the full DFT vibrational analysis for the basic anilino squaraine structure (**SQ1**). The intensities do not account for the large resonance enhancement observed for some bands. A good example of additional resonance enhancement is the symmetrical carbonyl vibration at 1740 cm<sup>-1</sup>. The calculated intensity is 106 but when observed in SERRS this band is one of the strongest.

| Frequency/cm <sup>-1</sup> | Symmetry        | I (IR) | I (Raman) | Assignment                     |
|----------------------------|-----------------|--------|-----------|--------------------------------|
| 3                          | B <sub>1u</sub> | 1      | 0         |                                |
| 16                         | B <sub>2g</sub> | 0      | 21        |                                |
| 21                         | B <sub>1u</sub> | 7      | 0         |                                |
| 27                         | B <sub>2u</sub> | 4      | 0         |                                |
| 47                         | A <sub>u</sub>  | 0      | 0         |                                |
| 53                         | B <sub>2g</sub> | 0      | 1         |                                |
| 63                         | B <sub>3g</sub> | 0      | 0         |                                |
| 75                         | B <sub>1u</sub> | 0      | 0         |                                |
| 81                         | A <sub>u</sub>  | 0      | 0         |                                |
| 84                         | B <sub>1g</sub> | 0      | 6         |                                |
| 90                         | B <sub>3g</sub> | 0      | 2         |                                |
| 159                        | B <sub>1u</sub> | 10     | 0         |                                |
| 159                        | B <sub>2g</sub> | 0      | 2         |                                |
| 166                        | A <sub>g</sub>  | 0      | 151       | C-C bonds connecting Ph and C4 |
| 172                        | A <sub>u</sub>  | 0      | 0         |                                |
| 172                        | B <sub>3g</sub> | 0      | 0         |                                |
| 202                        | B <sub>1g</sub> | 0      | 13        |                                |
| 209                        | B <sub>2u</sub> | 0      | 0         |                                |
| 224                        | B <sub>1u</sub> | 0      | 0         |                                |
| 235                        | B <sub>3u</sub> | 0      | 0         |                                |
| 274                        | B <sub>2g</sub> | 0      | 0         |                                |
| 304                        | B <sub>1g</sub> | 0      | 5         |                                |
| 325                        | B <sub>1u</sub> | 6      | 0         |                                |
| 346                        | B <sub>2u</sub> | 0      | 0         |                                |
| 379                        | B <sub>3u</sub> | 27     | 0         |                                |
| 412                        | B <sub>3g</sub> | 0      | 0         |                                |
| 414                        | A <sub>u</sub>  | 0      | 0         |                                |
| 426                        | A <sub>g</sub>  | 0      | 20        |                                |
| 470                        | B <sub>1g</sub> | 0      | 0         |                                |
| 474                        | B <sub>2u</sub> | 7      | 0         |                                |
| 475                        | B <sub>2g</sub> | 0      | 8         |                                |

Supplementary Material (ESI) for Chemical Communications  
 This journal is (c) The Royal Society of Chemistry 2007

|      |                 |     |     |                             |
|------|-----------------|-----|-----|-----------------------------|
| 506  | B <sub>3u</sub> | 74  | 0   |                             |
| 509  | B <sub>1u</sub> | 33  | 0   |                             |
| 564  | B <sub>2g</sub> | 0   | 0   |                             |
| 576  | A <sub>g</sub>  | 0   | 23  |                             |
| 615  | B <sub>1g</sub> | 0   | 12  |                             |
| 617  | B <sub>2u</sub> | 1   | 0   |                             |
| 636  | B <sub>3g</sub> | 0   | 0   |                             |
| 649  | A <sub>g</sub>  | 0   | 59  |                             |
| 675  | B <sub>3u</sub> | 3   | 0   |                             |
| 719  | B <sub>1u</sub> | 1   | 0   |                             |
| 737  | B <sub>2g</sub> | 0   | 3   |                             |
| 746  | A <sub>g</sub>  | 0   | 135 | Ph C-C and C-N combinations |
| 772  | B <sub>1u</sub> | 23  | 0   |                             |
| 778  | A <sub>u</sub>  | 0   | 0   |                             |
| 779  | B <sub>3g</sub> | 0   | 1   |                             |
| 783  | B <sub>3u</sub> | 97  | 0   |                             |
| 792  | B <sub>1G</sub> | 0   | 6   |                             |
| 804  | B <sub>2G</sub> | 0   | 0   |                             |
| 807  | B <sub>1u</sub> | 87  | 0   |                             |
| 929  | A <sub>g</sub>  | 0   | 383 | C-N combinations            |
| 930  | B <sub>3u</sub> | 108 | 0   | C-N combinations            |
| 945  | B <sub>1u</sub> | 5   | 0   |                             |
| 945  | B <sub>2g</sub> | 0   | 0   |                             |
| 949  | B <sub>3g</sub> | 0   | 0   |                             |
| 949  | A <sub>u</sub>  | 0   | 0   |                             |
| 978  | A <sub>g</sub>  | 50  | 0   |                             |
| 981  | B <sub>3u</sub> | 1   | 0   |                             |
| 1027 | A <sub>g</sub>  | 0   | 118 | Ph C-C combinations         |
| 1043 | B <sub>2u</sub> | 32  | 0   |                             |
| 1043 | B <sub>1g</sub> | 0   | 1   |                             |
| 1049 | B <sub>1g</sub> | 0   | 135 | C4 C-C combinations         |
| 1051 | B <sub>2u</sub> | 12  | 0   |                             |
| 1093 | B <sub>3g</sub> | 0   | 2   |                             |
| 1093 | A <sub>u</sub>  | 0   | 0   |                             |
| 1094 | B <sub>2g</sub> | 0   | 0   |                             |
| 1094 | B <sub>1u</sub> | 0   | 0   |                             |
| 1104 | B <sub>3u</sub> | 6   | 0   |                             |
| 1118 | B <sub>1g</sub> | 0   | 5   |                             |
| 1121 | B <sub>2u</sub> | 12  | 0   |                             |
| 1150 | B <sub>3u</sub> | 99  | 0   |                             |
| 1150 | A <sub>g</sub>  | 0   | 252 | Me C-H and C-N combinations |

Supplementary Material (ESI) for Chemical Communications  
 This journal is (c) The Royal Society of Chemistry 2007

|      |                 |      |      |                                |
|------|-----------------|------|------|--------------------------------|
| 1173 | B <sub>3u</sub> | 825  | 0    | Ph C-H combinations            |
| 1178 | A <sub>g</sub>  | 0    | 295  | Ph C-H combinations            |
| 1228 | B <sub>1g</sub> | 0    | 183  | C-N combinations               |
| 1228 | B <sub>2u</sub> | 45   | 0    |                                |
| 1294 | B <sub>1g</sub> | 0    | 10   |                                |
| 1295 | B <sub>2u</sub> | 38   | 0    |                                |
| 1339 | B <sub>1g</sub> | 0    | 4    |                                |
| 1340 | B <sub>2u</sub> | 0    | 0    |                                |
| 1347 | B <sub>3u</sub> | 1033 | 0    | Ph C-C and C-N combinations    |
| 1350 | A <sub>g</sub>  | 0    | 295  | Ph and C4 C-C combinations     |
| 1386 | B <sub>3u</sub> | 2495 | 0    | Ph and C4 C-C combinations     |
| 1394 | B <sub>1g</sub> | 0    | 52   |                                |
| 1394 | B <sub>2u</sub> | 1    | 0    |                                |
| 1424 | A <sub>g</sub>  | 0    | 134  | Me C-H and Ph C-H combinations |
| 1432 | B <sub>3g</sub> | 0    | 14   |                                |
| 1432 | A <sub>u</sub>  | 0    | 0    |                                |
| 1438 | B <sub>2u</sub> | 2    | 0    |                                |
| 1438 | B <sub>1g</sub> | 0    | 214  | Me C-H and Ph C-H combinations |
| 1440 | B <sub>3u</sub> | 47   | 0    |                                |
| 1441 | B <sub>1u</sub> | 36   | 0    |                                |
| 1441 | B <sub>2g</sub> | 0    | 93   |                                |
| 1456 | A <sub>g</sub>  | 0    | 147  | Me C-H combinations            |
| 1461 | B <sub>1g</sub> | 0    | 6    |                                |
| 1461 | B <sub>2u</sub> | 8    | 0    |                                |
| 1475 | B <sub>3u</sub> | 515  | 0    | Me C-H combinations            |
| 1485 | A <sub>g</sub>  | 0    | 4    |                                |
| 1506 | B <sub>1g</sub> | 0    | 3    |                                |
| 1508 | B <sub>2u</sub> | 8    | 0    |                                |
| 1518 | B <sub>3u</sub> | 63   | 0    |                                |
| 1545 | A <sub>g</sub>  | 0    | 6470 | Ph C-C and C4 combinations     |
| 1592 | B <sub>3u</sub> | 1849 | 0    | Ph C-C combinations            |
| 1603 | A <sub>g</sub>  | 0    | 2833 | Ph C-C combinations            |
| 1638 | B <sub>2u</sub> | 798  | 0    | C-O combination                |
| 1740 | A <sub>g</sub>  | 0    | 106  | Symmetrical C-O combination*   |
| 2926 | B <sub>1g</sub> | 0    | 986  | Me C-H combinations            |
| 2926 | B <sub>2u</sub> | 150  | 0    |                                |
| 2932 | B <sub>3u</sub> | 537  | 0    |                                |
| 2933 | A <sub>g</sub>  | 0    | 2678 | Me C-H combinations            |
| 2975 | B <sub>3g</sub> | 0    | 326  | Me C-H combinations            |
| 2975 | A <sub>u</sub>  | 0    | 0    |                                |
| 2975 | B <sub>2g</sub> | 0    | 696  | Me C-H combinations            |

Supplementary Material (ESI) for Chemical Communications  
This journal is (c) The Royal Society of Chemistry 2007

|      |                 |     |     |                     |
|------|-----------------|-----|-----|---------------------|
| 2975 | B <sub>1u</sub> | 114 | 0   | Me C-H combinations |
| 3059 | B <sub>1g</sub> | 0   | 35  |                     |
| 3059 | B <sub>2u</sub> | 3   | 0   |                     |
| 3069 | B <sub>3u</sub> | 79  | 0   |                     |
| 3069 | A <sub>g</sub>  | 0   | 738 | Me C-H combinations |
| 3105 | B <sub>3u</sub> | 1   | 0   |                     |
| 3105 | A <sub>g</sub>  | 0   | 172 | Ph C-H combinations |
| 3105 | B <sub>1g</sub> | 0   | 33  |                     |
| 3105 | B <sub>2u</sub> | 2   | 0   |                     |
| 3127 | B <sub>1g</sub> | 0   | 251 | Ph C-H combinations |
| 3127 | B <sub>2u</sub> | 15  | 0   |                     |
| 3128 | B <sub>3u</sub> | 67  | 0   |                     |
| 3128 | A <sub>g</sub>  | 0   | 715 | Ph C-H combinations |
